# Supplementary material for: Computational screening of a promising diatomic catalyst for CO2 electroreduction to syngas
Source: Royal Society of Chemistry journal article supplement (doi:10.1039/d3ta06369k), 2024-01-01
Supplement: d3ta06369k1.pdf [file d3ta06369k1.pdf]

## **Supporting Information**

### **Computational Screening of Promising Diatomic Catalyst for CO<sub>2</sub> Electroreduction to Syngas**

Lipan Luo, Zhou Huang and Qing Tang\*

School of Chemistry and Chemical Engineering, Chongqing Key Laboratory of  
Theoretical and Computational Chemistry, Chongqing University, Chongqing 401331,  
China.

\*To whom correspondence should be addressed. E-mail: [qingtang@cqu.edu.cn](mailto:qingtang@cqu.edu.cn)

Table S1. Thermodynamic reactions of syngas feedstock products from HER and CO<sub>2</sub>RR and their reduction potentials (vs. RHE).

| Product        | Half-cell reaction                                                                     | $U_e$ (V vs. RHE) |
|----------------|----------------------------------------------------------------------------------------|-------------------|
| H <sub>2</sub> | $2 \text{H}^+ + 2 \text{e}^- \rightarrow \text{H}_2$                                   | 0                 |
| CO             | $\text{CO}_2 + 2 \text{H}^+ + 2 \text{e}^- \rightarrow \text{CO} + \text{H}_2\text{O}$ | -0.10             |

Table S2. The detailed electronic energy ( $E^*$ ), zero-point energy ( $E_{\text{ZPE}}$ ), entropy corrections ( $TS$ ), and free energy ( $G$ ) of isolated molecule during electrochemical CO<sub>2</sub>RR and HER.

| Species          | $E^*$  | $E_{\text{ZPE}}$ | $TS$ | $G$    |
|------------------|--------|------------------|------|--------|
| CO <sub>2</sub>  | -22.96 | 0.31             | 0.66 | -23.31 |
| CO               | -14.84 | 0.14             | 0.61 | -15.31 |
| H <sub>2</sub> O | -14.25 | 0.59             | 0.58 | -14.24 |
| H <sub>2</sub>   | -6.76  | 0.27             | 0.40 | -6.89  |

Table S3. The detailed electronic energy ( $E^*$ ), zero-point energy ( $E_{\text{ZPE}}$ ), entropy corrections ( $TS$ ), free energy ( $G$ ), and Gibbs free energy change ( $\Delta G$ ) of \*H intermediate on M1M2@DAC1 during electrochemical HER.

| Species | $E^*$   | $E_{\text{H}}^*$ | $E_{\text{ZPE}}$ | $TS$ | $G$     | $\Delta G_{\text{H}}^*$ |
|---------|---------|------------------|------------------|------|---------|-------------------------|
| Cr-Mn   | -438.33 | -441.73          | 0.20             | 0.01 | -441.54 | 0.24                    |
| Cr-Fe   | -437.29 | -440.78          | 0.21             | 0.01 | -440.57 | 0.17                    |
| Cr-Co   | -436.22 | -439.07          | 0.21             | 0.01 | -438.87 | 0.80                    |

---

|       |         |         |      |      |         |       |
|-------|---------|---------|------|------|---------|-------|
| Cr-Ni | -434.28 | -436.06 | 0.14 | 0.01 | -435.93 | 1.80  |
| Cr-Cu | -431.06 | -432.88 | 0.14 | 0.03 | -432.76 | 1.75  |
| Cr-Zn | -428.62 | -431.78 | 0.16 | 0.02 | -431.64 | 0.42  |
| Mn-Cr | -438.33 | -441.96 | 0.20 | 0.01 | -441.77 | 0.01  |
| Mn-Fe | -436.57 | -440.30 | 0.22 | 0.01 | -440.09 | -0.07 |
| Mn-Co | -435.66 | -438.30 | 0.21 | 0.01 | -438.11 | 1.00  |
| Mn-Ni | -433.43 | -435.43 | 0.17 | 0.01 | -435.27 | 1.62  |
| Mn-Cu | -430.32 | -432.13 | 0.14 | 0.02 | -432.01 | 1.75  |
| Fe-Cr | -437.29 | -440.75 | 0.20 | 0.01 | -440.56 | 0.18  |
| Fe-Mn | -436.57 | -439.32 | 0.20 | 0.01 | -439.13 | 0.90  |
| Fe-Co | -434.10 | -436.67 | 0.20 | 0.01 | -436.48 | 1.07  |
| Fe-Zn | -426.58 | -429.57 | 0.15 | 0.03 | -429.45 | 0.58  |
| Co-Cr | -436.22 | -439.59 | 0.20 | 0.01 | -439.40 | 0.27  |
| Co-Mn | -435.66 | -438.85 | 0.21 | 0.01 | -438.65 | 0.46  |
| Co-Fe | -434.10 | -437.54 | 0.22 | 0.01 | -437.33 | 0.22  |
| Co-Ni | -430.76 | -432.83 | 0.18 | 0.01 | -432.66 | 1.55  |
| Co-Cu | -427.61 | -429.43 | 0.13 | 0.03 | -429.32 | 1.73  |
| Ni-Cr | -434.28 | -437.66 | 0.20 | 0.01 | -437.47 | 0.26  |
| Ni-Mn | -433.43 | -436.78 | 0.21 | 0.01 | -436.58 | 0.30  |
| Ni-Fe | -432.16 | -435.41 | 0.21 | 0.01 | -435.22 | 0.39  |
| Ni-Co | -430.76 | -433.80 | 0.21 | 0.01 | -433.60 | 0.61  |
| Ni-Cu | -426.12 | -427.80 | 0.13 | 0.02 | -427.70 | 1.87  |

---

|       |         |         |      |      |         |      |
|-------|---------|---------|------|------|---------|------|
| Ni-Zn | -423.94 | -426.53 | 0.16 | 0.03 | -426.41 | 0.98 |
| Cu-Cr | -431.06 | -434.46 | 0.20 | 0.01 | -434.28 | 0.23 |
| Cu-Mn | -430.32 | -433.43 | 0.21 | 0.01 | -433.23 | 0.54 |
| Cu-Fe | -429.02 | -432.25 | 0.21 | 0.01 | -432.06 | 0.41 |
| Cu-Co | -427.61 | -430.69 | 0.21 | 0.01 | -430.50 | 0.56 |
| Cu-Ni | -426.12 | -428.46 | 0.19 | 0.01 | -428.29 | 1.28 |
| Cu-Zn | -421.22 | -424.12 | 0.17 | 0.02 | -423.96 | 0.71 |
| Zn-Cr | -428.62 | -432.04 | 0.20 | 0.01 | -431.84 | 0.22 |
| Zn-Mn | -427.99 | -431.11 | 0.20 | 0.01 | -430.92 | 0.52 |
| Zn-Fe | -426.58 | -429.91 | 0.20 | 0.01 | -429.71 | 0.32 |
| Zn-Co | -425.26 | -428.44 | 0.21 | 0.01 | -428.23 | 0.47 |
| Zn-Ni | -423.94 | -426.29 | 0.19 | 0.01 | -426.12 | 1.27 |

Table S4. The detailed electronic energy ( $E^*$ ), zero-point energy ( $E_{\text{ZPE}}$ ), entropy corrections ( $TS$ ), free energy ( $G$ ), and Gibbs free energy change ( $\Delta G$ ) of  $^*\text{CO}_2$  intermediate on M1M2@DAC1 during electrochemical  $\text{CO}_2\text{RR}$ .

| Species | $E_{^*\text{CO}_2}$ | $E_{\text{ZPE}}$ | $TS$ | $G$     | $\Delta G_1$ |
|---------|---------------------|------------------|------|---------|--------------|
| Cr-Mn   | -461.58             | 0.31             | 0.07 | -461.35 | 0.09         |
| Cr-Fe   | -460.66             | 0.31             | 0.07 | -460.43 | -0.03        |
| Cr-Co   | -459.46             | 0.31             | 0.14 | -459.29 | 0.04         |
| Cr-Ni   | -457.53             | 0.31             | 0.12 | -457.33 | 0.06         |
| Cr-Cu   | -454.32             | 0.31             | 0.12 | -454.13 | 0.04         |

---

|       |         |      |      |         |       |
|-------|---------|------|------|---------|-------|
| Cr-Zn | -451.91 | 0.31 | 0.11 | -451.71 | 0.02  |
| Mn-Cr | -461.58 | 0.31 | 0.07 | -461.35 | 0.09  |
| Mn-Fe | -459.92 | 0.30 | 0.01 | -459.62 | 0.06  |
| Mn-Co | -458.89 | 0.31 | 0.13 | -458.71 | 0.06  |
| Mn-Ni | -456.66 | 0.31 | 0.07 | -456.43 | 0.12  |
| Mn-Cu | -453.57 | 0.31 | 0.07 | -453.33 | 0.10  |
| Fe-Cr | -460.41 | 0.31 | 0.07 | -460.18 | 0.22  |
| Fe-Mn | -460.25 | 0.30 | 0.01 | -459.96 | -0.27 |
| Fe-Co | -457.47 | 0.31 | 0.11 | -457.28 | -0.06 |
| Fe-Zn | -449.83 | 0.31 | 0.12 | -449.64 | 0.05  |
| Co-Cr | -459.48 | 0.31 | 0.07 | -459.25 | 0.08  |
| Co-Mn | -458.92 | 0.30 | 0.07 | -458.69 | 0.08  |
| Co-Fe | -457.47 | 0.31 | 0.18 | -457.34 | -0.13 |
| Co-Ni | -454.03 | 0.31 | 0.18 | -453.89 | -0.02 |
| Co-Cu | -450.87 | 0.30 | 0.07 | -450.64 | 0.07  |
| Ni-Cr | -457.54 | 0.31 | 0.13 | -457.36 | 0.03  |
| Ni-Mn | -456.70 | 0.31 | 0.19 | -456.58 | -0.03 |
| Ni-Fe | -455.35 | 0.32 | 0.22 | -455.25 | 0.02  |
| Ni-Co | -454.02 | 0.32 | 0.17 | -453.88 | -0.01 |
| Ni-Cu | -449.37 | 0.32 | 0.23 | -449.28 | -0.05 |
| Ni-Zn | -447.22 | 0.32 | 0.18 | -447.08 | -0.04 |
| Cu-Cr | -454.33 | 0.31 | 0.06 | -454.07 | 0.10  |

---

|       |         |      |      |         |       |
|-------|---------|------|------|---------|-------|
| Cu-Mn | -453.54 | 0.31 | 0.06 | -453.30 | 0.13  |
| Cu-Fe | -452.18 | 0.32 | 0.11 | -451.97 | 0.16  |
| Cu-Co | -450.85 | 0.31 | 0.13 | -450.66 | 0.06  |
| Cu-Ni | -449.37 | 0.31 | 0.12 | -449.17 | 0.06  |
| Cu-Zn | -444.43 | 0.31 | 0.12 | -444.24 | 0.09  |
| Zn-Cr | -451.87 | 0.32 | 0.17 | -451.72 | 0.00  |
| Zn-Mn | -451.25 | 0.31 | 0.12 | -451.06 | 0.04  |
| Zn-Fe | -449.84 | 0.31 | 0.19 | -449.72 | -0.02 |
| Zn-Co | -448.54 | 0.32 | 0.16 | -448.38 | -0.01 |
| Zn-Ni | -447.19 | 0.31 | 0.11 | -446.99 | 0.05  |

Table S5. The detailed electronic energy ( $E^*$ ), zero-point energy ( $E_{ZPE}$ ), entropy corrections ( $TS$ ), free energy ( $G$ ), and Gibbs free energy change ( $\Delta G$ ) of  $^*COOH$  intermediate on M1M2@DAC1 during electrochemical  $CO_2RR$ .

| Species | $E^*_{COOH}$ | $E_{ZPE}$ | $TS$ | $G$     | $\Delta G_2$ |
|---------|--------------|-----------|------|---------|--------------|
| Cr-Mn   | -465.41      | 0.60      | 0.13 | -464.94 | -0.14        |
| Cr-Fe   | -464.23      | 0.60      | 0.13 | -463.76 | 0.12         |
| Cr-Co   | -463.08      | 0.60      | 0.14 | -462.62 | 0.12         |
| Cr-Ni   | -461.16      | 0.61      | 0.12 | -460.67 | 0.12         |
| Cr-Cu   | -457.99      | 0.59      | 0.08 | -457.47 | 0.11         |
| Cr-Zn   | -455.75      | 0.61      | 0.16 | -455.30 | -0.15        |
| Mn-Cr   | -465.18      | 0.60      | 0.07 | -464.65 | 0.15         |

---

|       |         |      |      |         |       |
|-------|---------|------|------|---------|-------|
| Mn-Fe | -463.57 | 0.60 | 0.07 | -463.04 | 0.03  |
| Mn-Co | -462.32 | 0.61 | 0.12 | -461.84 | 0.33  |
| Mn-Ni | -460.29 | 0.61 | 0.06 | -459.74 | 0.13  |
| Mn-Cu | -456.98 | 0.60 | 0.07 | -456.45 | 0.33  |
| Fe-Cr | -464.17 | 0.61 | 0.12 | -463.68 | -0.05 |
| Fe-Mn | -463.87 | 0.62 | 0.12 | -463.37 | 0.04  |
| Fe-Co | -461.01 | 0.62 | 0.17 | -460.56 | 0.17  |
| Fe-Zn | -453.64 | 0.62 | 0.14 | -453.15 | -0.06 |
| Co-Cr | -462.56 | 0.62 | 0.17 | -462.11 | 0.59  |
| Co-Mn | -461.78 | 0.61 | 0.11 | -461.28 | 0.86  |
| Co-Fe | -460.25 | 0.61 | 0.11 | -459.75 | 1.04  |
| Co-Ni | -457.30 | 0.62 | 0.16 | -456.84 | 0.50  |
| Co-Cu | -454.20 | 0.61 | 0.12 | -453.71 | 0.38  |
| Ni-Cr | -459.64 | 0.59 | 0.14 | -459.19 | 1.62  |
| Ni-Mn | -458.97 | 0.61 | 0.17 | -458.52 | 1.50  |
| Ni-Fe | -457.60 | 0.61 | 0.18 | -457.17 | 1.53  |
| Ni-Co | -456.36 | 0.61 | 0.18 | -455.93 | 1.40  |
| Ni-Cu | -451.90 | 0.62 | 0.13 | -451.41 | 1.31  |
| Ni-Zn | -449.75 | 0.61 | 0.18 | -449.33 | 1.21  |
| Cu-Cr | -456.51 | 0.59 | 0.15 | -456.08 | 1.45  |
| Cu-Mn | -455.73 | 0.58 | 0.09 | -455.24 | 1.51  |
| Cu-Fe | -454.23 | 0.58 | 0.15 | -453.80 | 1.62  |

---

|       |         |      |      |         |      |
|-------|---------|------|------|---------|------|
| Cu-Co | -452.98 | 0.60 | 0.12 | -452.51 | 1.60 |
| Cu-Ni | -451.44 | 0.59 | 0.13 | -450.98 | 1.64 |
| Cu-Zn | -446.50 | 0.59 | 0.13 | -446.04 | 1.65 |
| Zn-Cr | -455.16 | 0.60 | 0.18 | -454.74 | 0.43 |
| Zn-Mn | -454.49 | 0.60 | 0.19 | -454.08 | 0.43 |
| Zn-Fe | -453.02 | 0.60 | 0.19 | -452.61 | 0.56 |
| Zn-Co | -451.53 | 0.60 | 0.19 | -451.12 | 0.71 |
| Zn-Ni | -449.92 | 0.59 | 0.13 | -449.45 | 0.99 |

Table S6. The detailed electronic energy ( $E^*$ ), zero-point energy ( $E_{ZPE}$ ), entropy corrections ( $TS$ ), free energy ( $G$ ), and Gibbs free energy change ( $\Delta G$ ) of \*CO intermediate on M1M2@DAC1 during electrochemical CO<sub>2</sub>RR.

| Species | $E^*_{CO}$ | $E_{ZPE}$ | $TS$ | $G$     | $\Delta G_3$ | $\Delta G_4$ |
|---------|------------|-----------|------|---------|--------------|--------------|
| Cr-Mn   | -454.61    | 0.20      | 0.08 | -454.49 | -0.34        | 0.50         |
| Cr-Fe   | -453.19    | 0.20      | 0.09 | -453.08 | -0.12        | 0.14         |
| Cr-Co   | -452.28    | 0.20      | 0.16 | -452.24 | -0.41        | 0.37         |
| Cr-Ni   | -450.39    | 0.20      | 0.09 | -450.28 | -0.40        | 0.35         |
| Cr-Cu   | -447.23    | 0.19      | 0.04 | -447.08 | -0.40        | 0.37         |
| Cr-Zn   | -443.57    | 0.15      | 0.15 | -443.57 | 0.94         | -0.69        |
| Mn-Cr   | -453.40    | 0.19      | 0.08 | -453.30 | 0.56         | -0.68        |
| Mn-Fe   | -451.78    | 0.18      | 0.08 | -451.69 | 0.57         | -0.54        |
| Mn-Co   | -450.72    | 0.19      | 0.08 | -450.61 | 0.44         | -0.70        |



---

|       |         |      |      |         |       |       |
|-------|---------|------|------|---------|-------|-------|
| Mn-Ni | -448.52 | 0.19 | 0.08 | -448.40 | 0.55  | -0.68 |
| Mn-Cu | -445.27 | 0.15 | 0.16 | -445.28 | 0.38  | -0.69 |
| Fe-Cr | -452.22 | 0.16 | 0.23 | -452.29 | 0.60  | -0.64 |
| Fe-Mn | -451.91 | 0.15 | 0.19 | -451.95 | 0.63  | -0.27 |
| Fe-Co | -449.19 | 0.15 | 0.15 | -449.19 | 0.58  | -0.56 |
| Fe-Zn | -441.53 | 0.14 | 0.15 | -441.54 | 0.82  | -0.70 |
| Co-Cr | -451.20 | 0.15 | 0.14 | -451.19 | 0.13  | -0.68 |
| Co-Mn | -450.63 | 0.15 | 0.14 | -450.62 | -0.13 | -0.69 |
| Co-Fe | -449.18 | 0.15 | 0.20 | -449.23 | -0.27 | -0.52 |
| Co-Ni | -445.75 | 0.14 | 0.08 | -445.69 | 0.35  | -0.71 |
| Co-Cu | -442.59 | 0.15 | 0.14 | -442.58 | 0.34  | -0.68 |
| Ni-Cr | -449.23 | 0.15 | 0.21 | -449.29 | -0.89 | -0.64 |
| Ni-Mn | -448.37 | 0.15 | 0.20 | -448.42 | -0.69 | -0.66 |
| Ni-Fe | -447.04 | 0.15 | 0.21 | -447.10 | -0.71 | -0.71 |
| Ni-Co | -445.72 | 0.15 | 0.27 | -445.83 | -0.69 | -0.58 |
| Ni-Cu | -441.09 | 0.15 | 0.25 | -441.19 | -0.57 | -0.58 |
| Ni-Zn | -438.92 | 0.15 | 0.19 | -438.96 | -0.43 | -0.63 |
| Cu-Cr | -446.01 | 0.15 | 0.15 | -446.01 | -0.72 | -0.70 |
| Cu-Mn | -445.26 | 0.15 | 0.21 | -445.32 | -0.88 | -0.64 |
| Cu-Fe | -443.89 | 0.14 | 0.16 | -443.90 | -0.89 | -0.76 |
| Cu-Co | -442.54 | 0.15 | 0.16 | -442.56 | -0.84 | -0.70 |
| Cu-Ni | -441.07 | 0.15 | 0.22 | -441.15 | -0.96 | -0.62 |

---

|       |         |      |      |         |       |       |
|-------|---------|------|------|---------|-------|-------|
| Cu-Zn | -436.15 | 0.15 | 0.15 | -436.16 | -0.91 | -0.71 |
| Zn-Cr | -443.57 | 0.15 | 0.19 | -443.60 | 0.35  | -0.66 |
| Zn-Mn | -443.06 | 0.17 | 0.08 | -442.97 | 0.32  | -0.67 |
| Zn-Fe | -441.54 | 0.15 | 0.20 | -441.59 | 0.23  | -0.64 |
| Zn-Co | -440.21 | 0.16 | 0.25 | -440.31 | 0.02  | -0.60 |
| Zn-Ni | -438.99 | 0.18 | 0.17 | -438.98 | -0.32 | -0.61 |

Table S7. The total energies of M1M2@DAC structures ( $E_{M1M2@DAC}$ ) (M = Cr, Mn, or Fe), individual metal atoms in bulk form ( $E_{M1}$  and  $E_{M2}$ ), and N-doped graphene substrate ( $E_{NC}$ ), along with their Binding Energies ( $E_b$ ).

| Species   | $E_{M1M2@DAC}$ | $E_{M1}$ | $E_{M2}$ | $E_{NC}$ | $E_b$ |
|-----------|----------------|----------|----------|----------|-------|
| CrMn@DAC1 | -434.75        | -9.64    | -9.16    | -411.59  | -4.36 |
| CrFe@DAC1 | -433.63        | -9.64    | -8.46    | -411.59  | -3.94 |
| MnFe@DAC1 | -433.17        | -9.16    | -8.46    | -411.59  | -3.96 |
| CrMn@DAC2 | -438.39        | -9.64    | -9.16    | -411.56  | -8.03 |
| CrFe@DAC2 | -437.40        | -9.64    | -8.46    | -411.56  | -7.74 |
| MnFe@DAC2 | -437.04        | -9.16    | -8.46    | -411.56  | -7.87 |
| CrMn@DAC3 | -434.99        | -9.64    | -9.16    | -411.09  | -5.10 |
| CrFe@DAC3 | -433.89        | -9.64    | -8.46    | -411.09  | -4.70 |
| MnFe@DAC3 | -433.41        | -9.16    | -8.46    | -411.09  | -4.70 |

Table S8. The total magnetization of M1M2@DAC structures ( $E_{M1M2@DAC}$ ) (M = Cr, Mn, or Fe) and metal atom.

| Species   | Total magnetization | Metal atom | Total magnetization |
|-----------|---------------------|------------|---------------------|
| CrMn@DAC1 | 3.34                | Cr         | 1.72                |
|           |                     | Mn         | 2.07                |
| CrFe@DAC1 | 2.55                | Cr         | 1.82                |
|           |                     | Fe         | 1.10                |
| MnFe@DAC1 | 1.32                | Mn         | 2.41                |
|           |                     | Fe         | -0.90               |
| CrMn@DAC2 | 6.29                | Cr         | 3.39                |
|           |                     | Mn         | 2.97                |
| CrFe@DAC2 | 5.29                | Cr         | 3.39                |
|           |                     | Fe         | 1.83                |
| MnFe@DAC2 | 4.66                | Mn         | 3.01                |
|           |                     | Fe         | 1.90                |
| CrMn@DAC3 | 6.17                | Cr         | 3.41                |
|           |                     | Mn         | 2.96                |
| CrFe@DAC3 | 5.19                | Cr         | 3.42                |
|           |                     | Fe         | 1.85                |
| MnFe@DAC3 | 4.49                | Mn         | 2.98                |
|           |                     | Fe         | 1.81                |

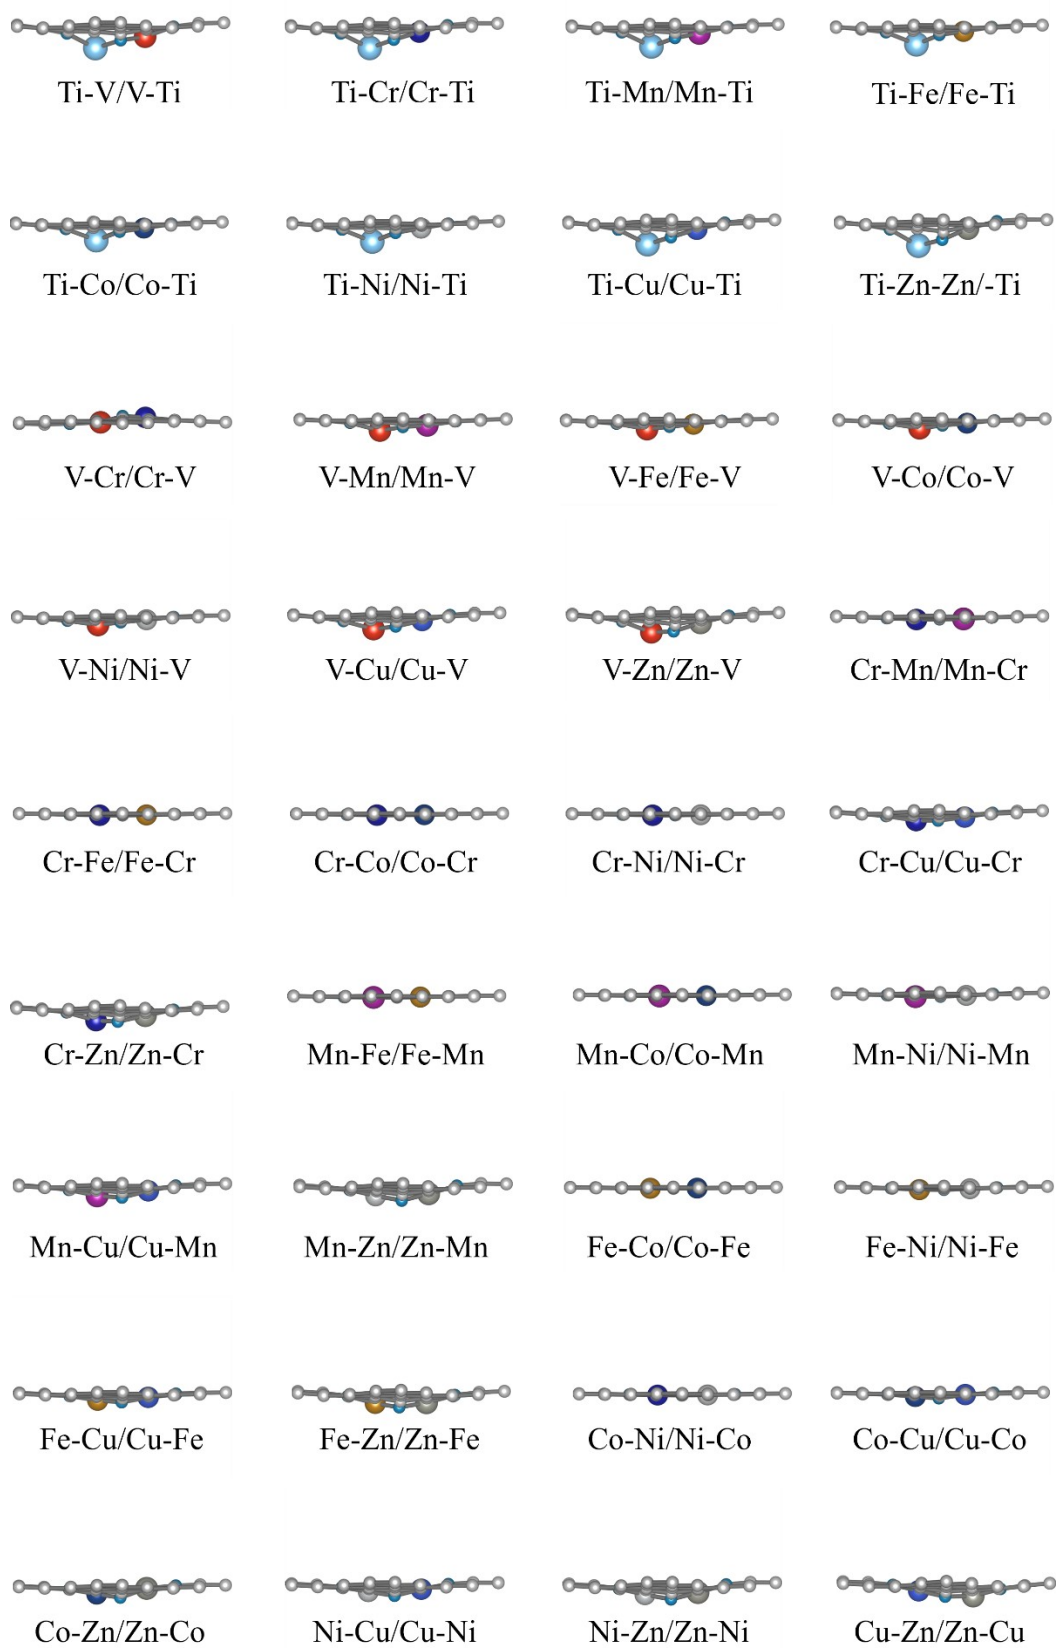

Figure S1. The side view of the optimized structures of DACs with M1M2@DAC1 configuration.

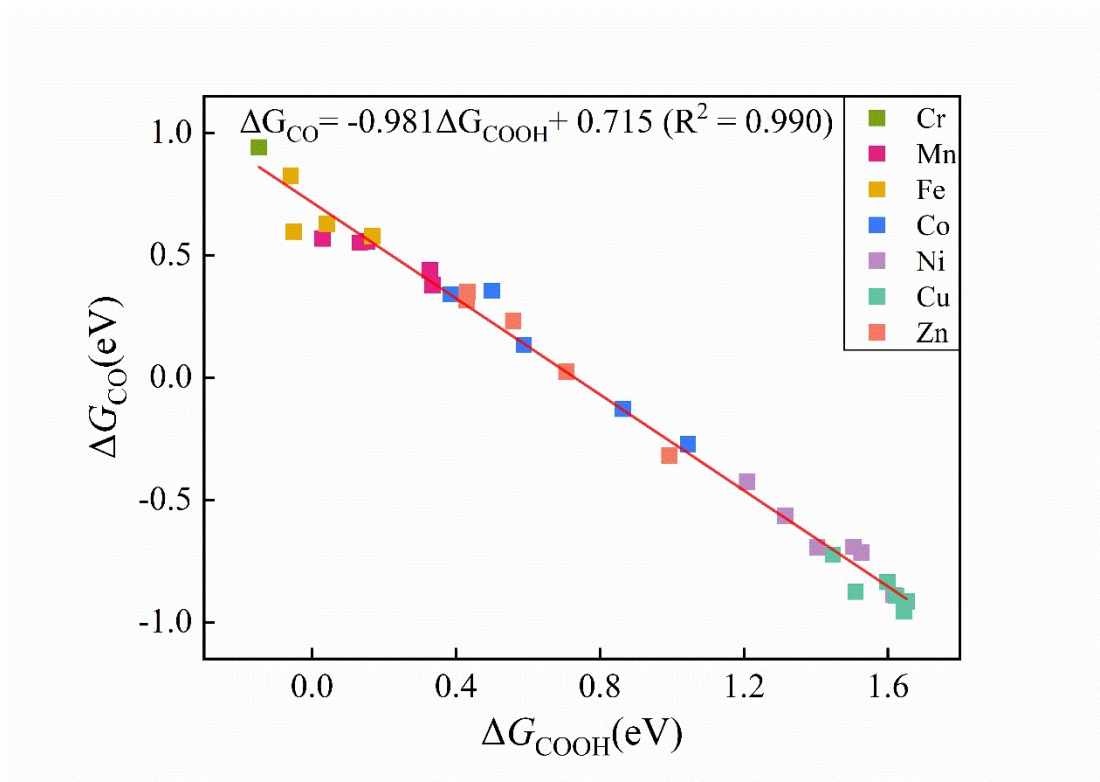

Figure S2. Refined linear scaling relations for  $\Delta G_{\text{COOH}}$  and  $\Delta G_{\text{CO}}$  in M1M2@DAC1, excluding outlier points from Cr-based configurations.

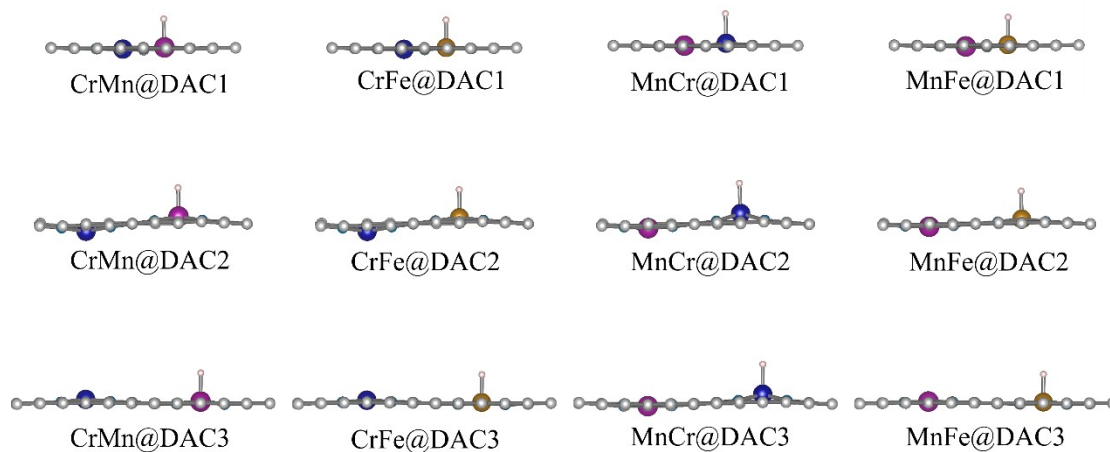

Figure S3. The most stable structures of  $*\text{H}$  adsorbed on three configurations of DACs.

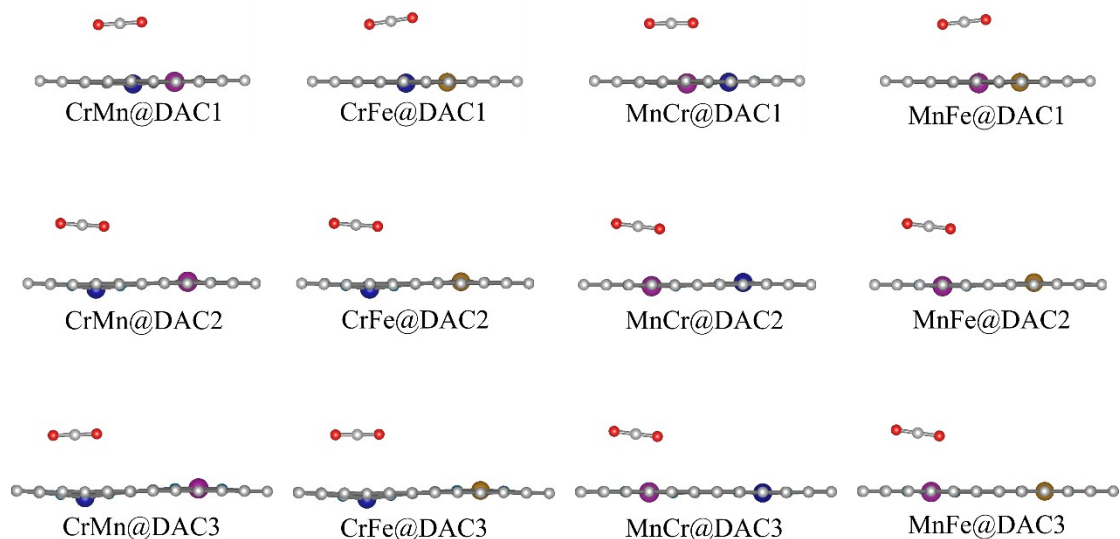

Figure S4. The most stable structures of  $^*CO_2$  adsorbed on three configurations of DACs.

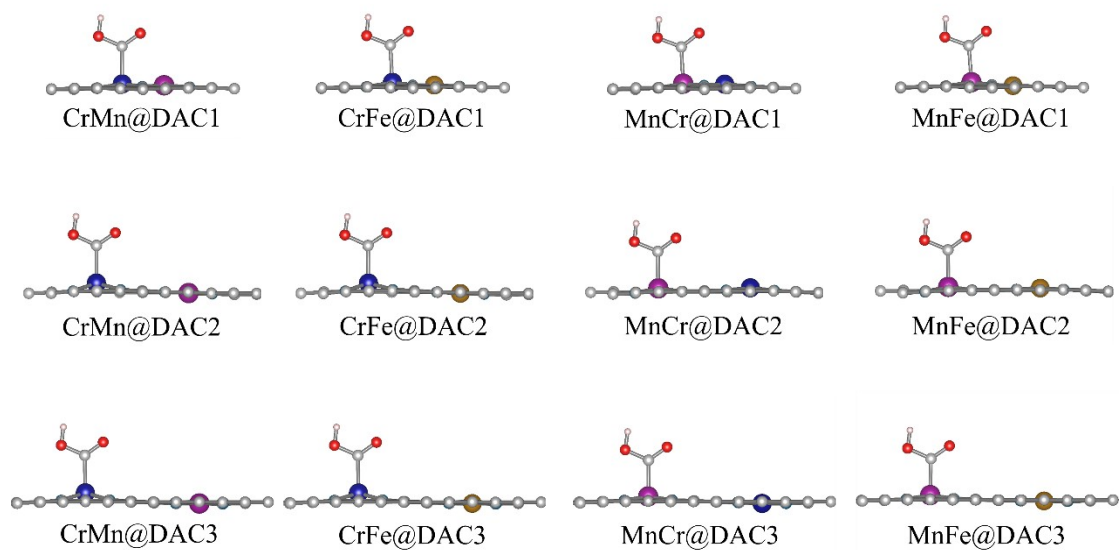

Figure S5. The most stable structures of  $^*COOH$  adsorbed on three configurations of DACs.

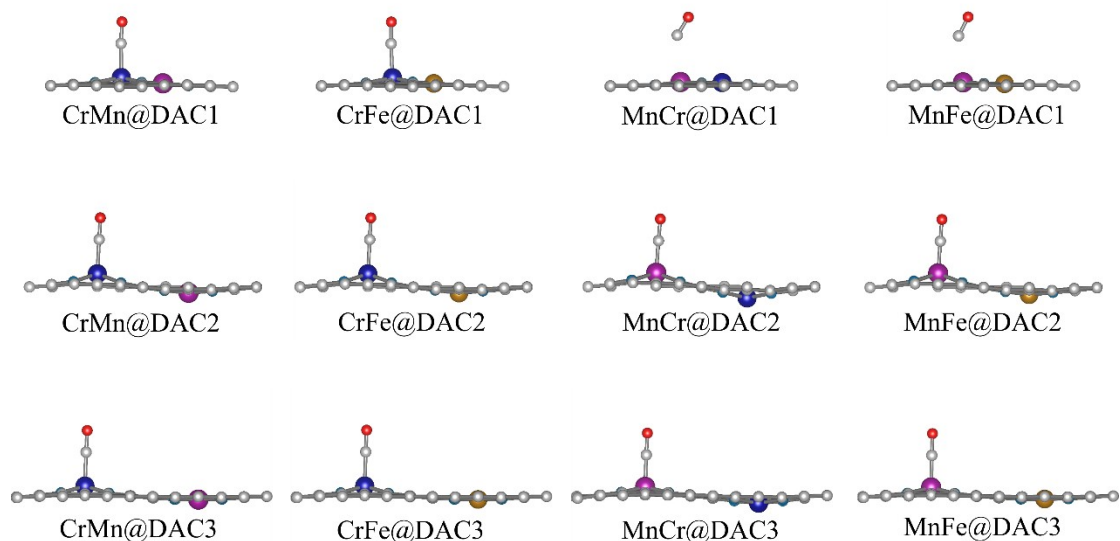

Figure S6. The most stable structures of \*CO adsorbed on three configurations of DACs.

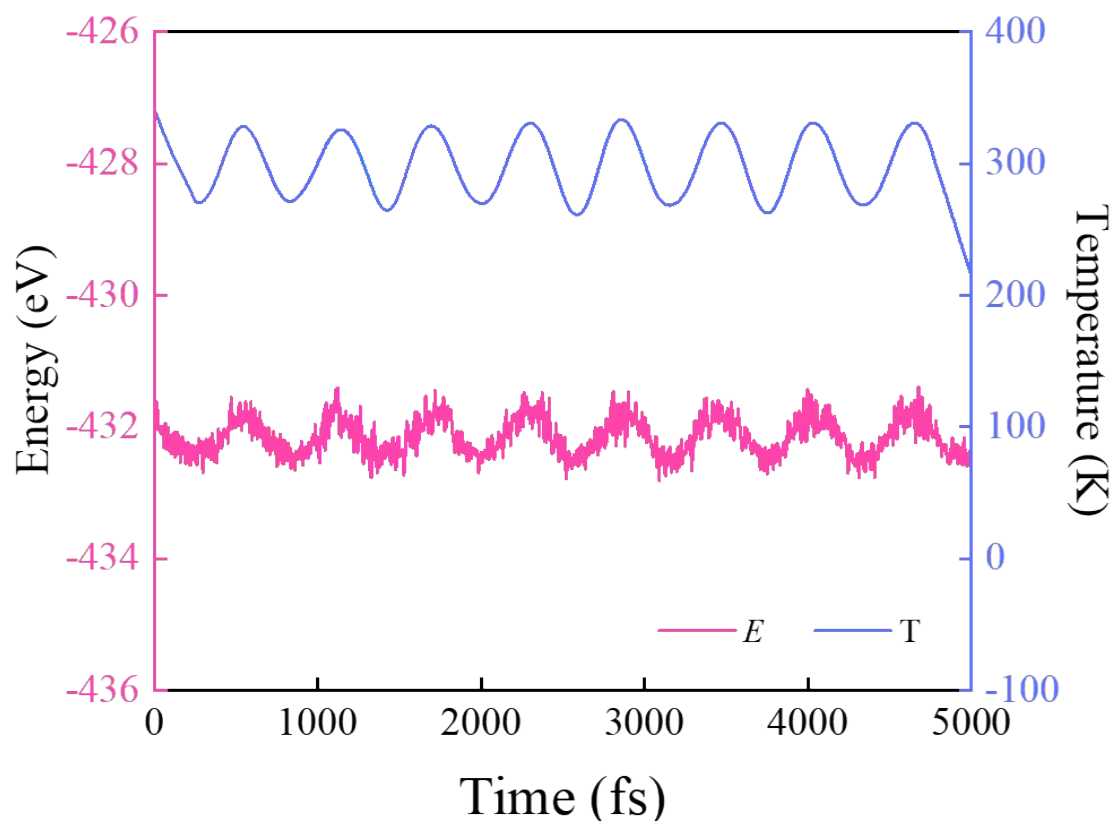

Figure S7. AIMD simulation of CrFe@DAC2 at 300K over 5 ps with a time step of 1fs.

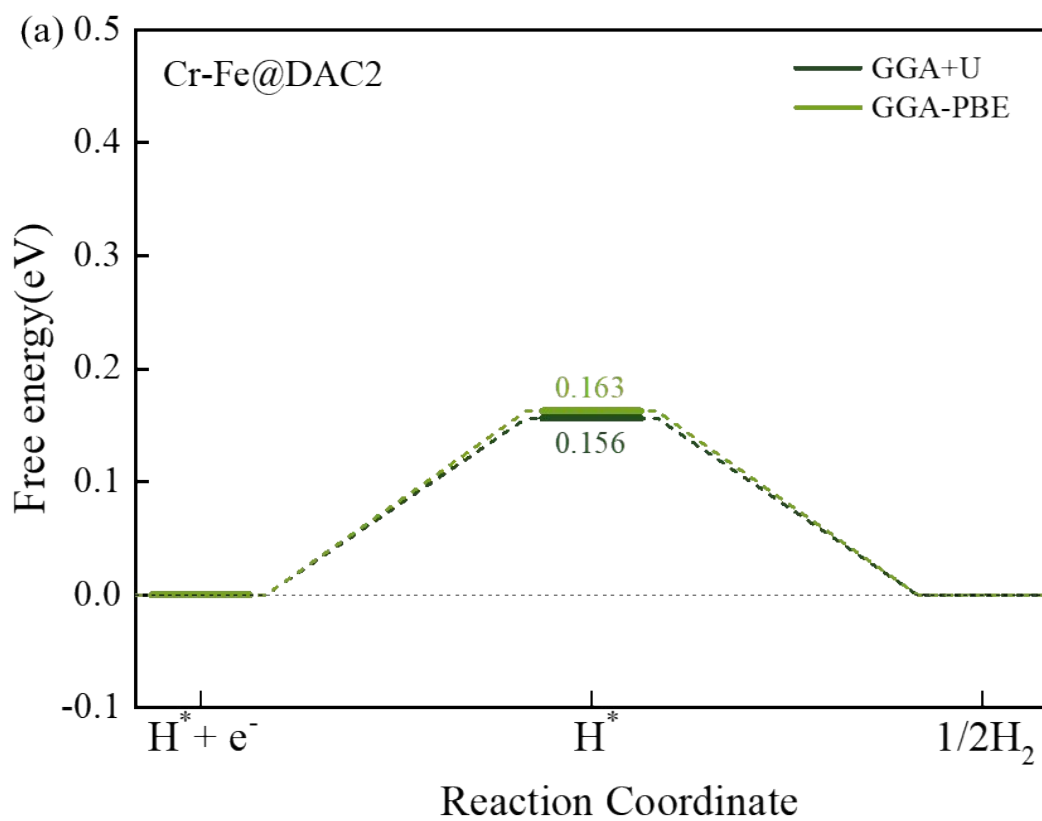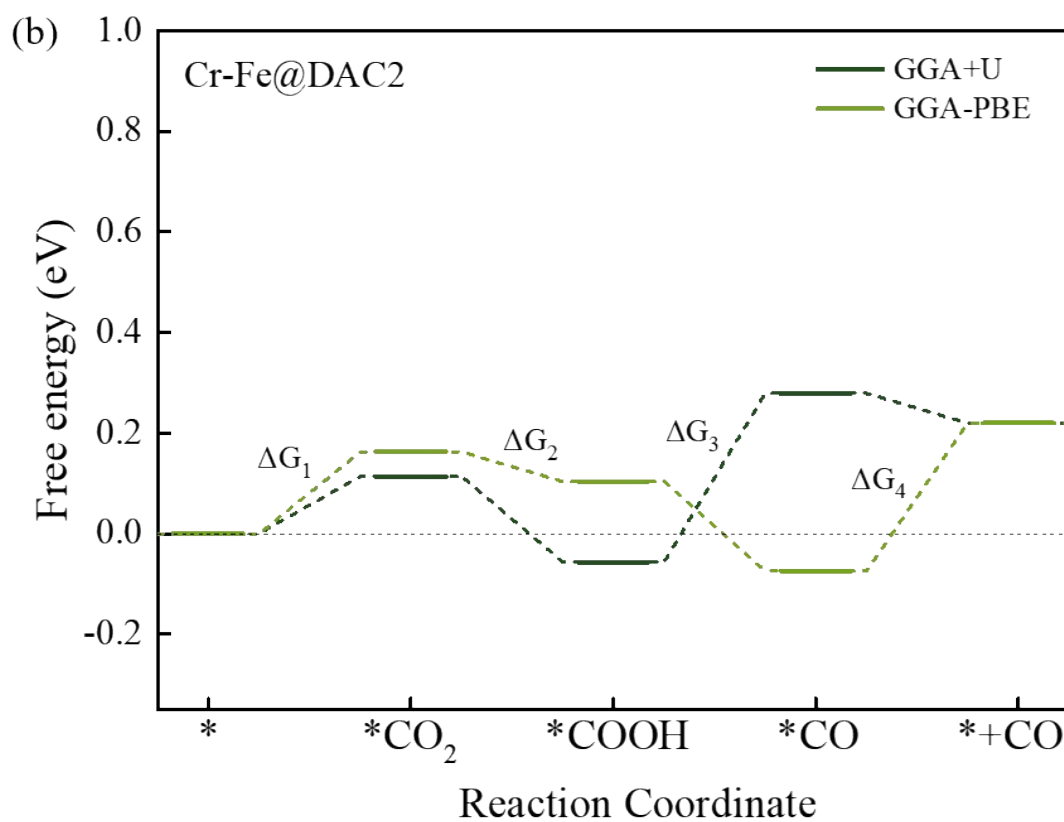

Figure S8. Comparison of free energies diagram of HER (a) and CO<sub>2</sub>RR-to-CO (b) on CrFe@DAC2 calculated using GGA-PBE and GGA+*U* generalized functions.



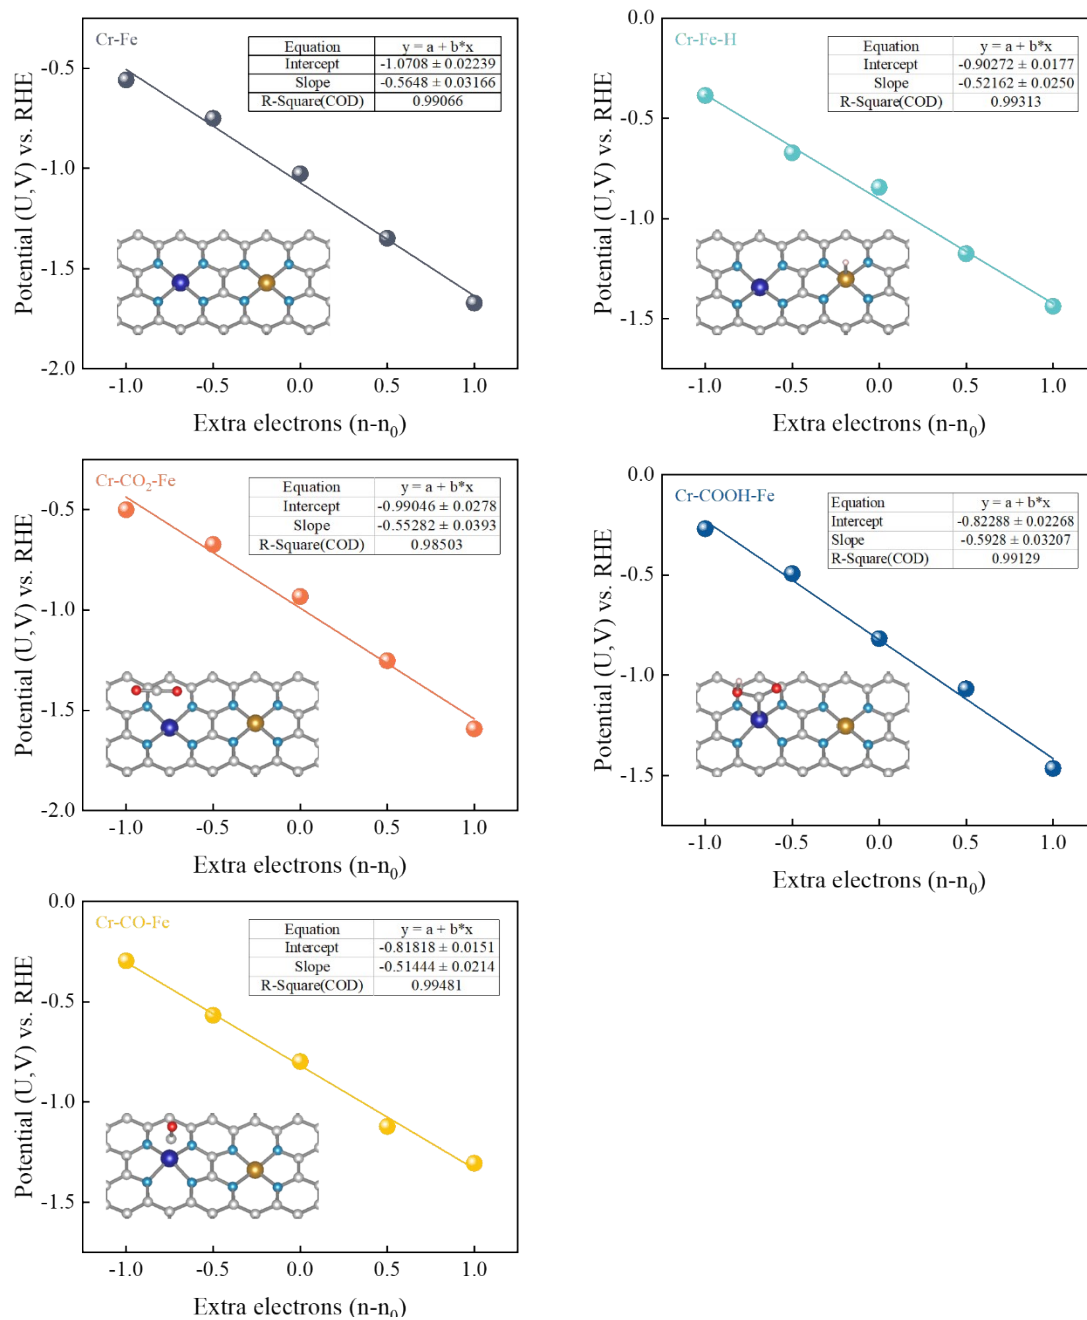

Figure S9. The relationships between the extra electrons ( $n-n_0$ ) and the corresponded electrode potential  $U_{\text{RHE}}$  on CrFe@DAC2 and its configurations adsorbing CO<sub>2</sub>RR-to-CO and HER intermediates.

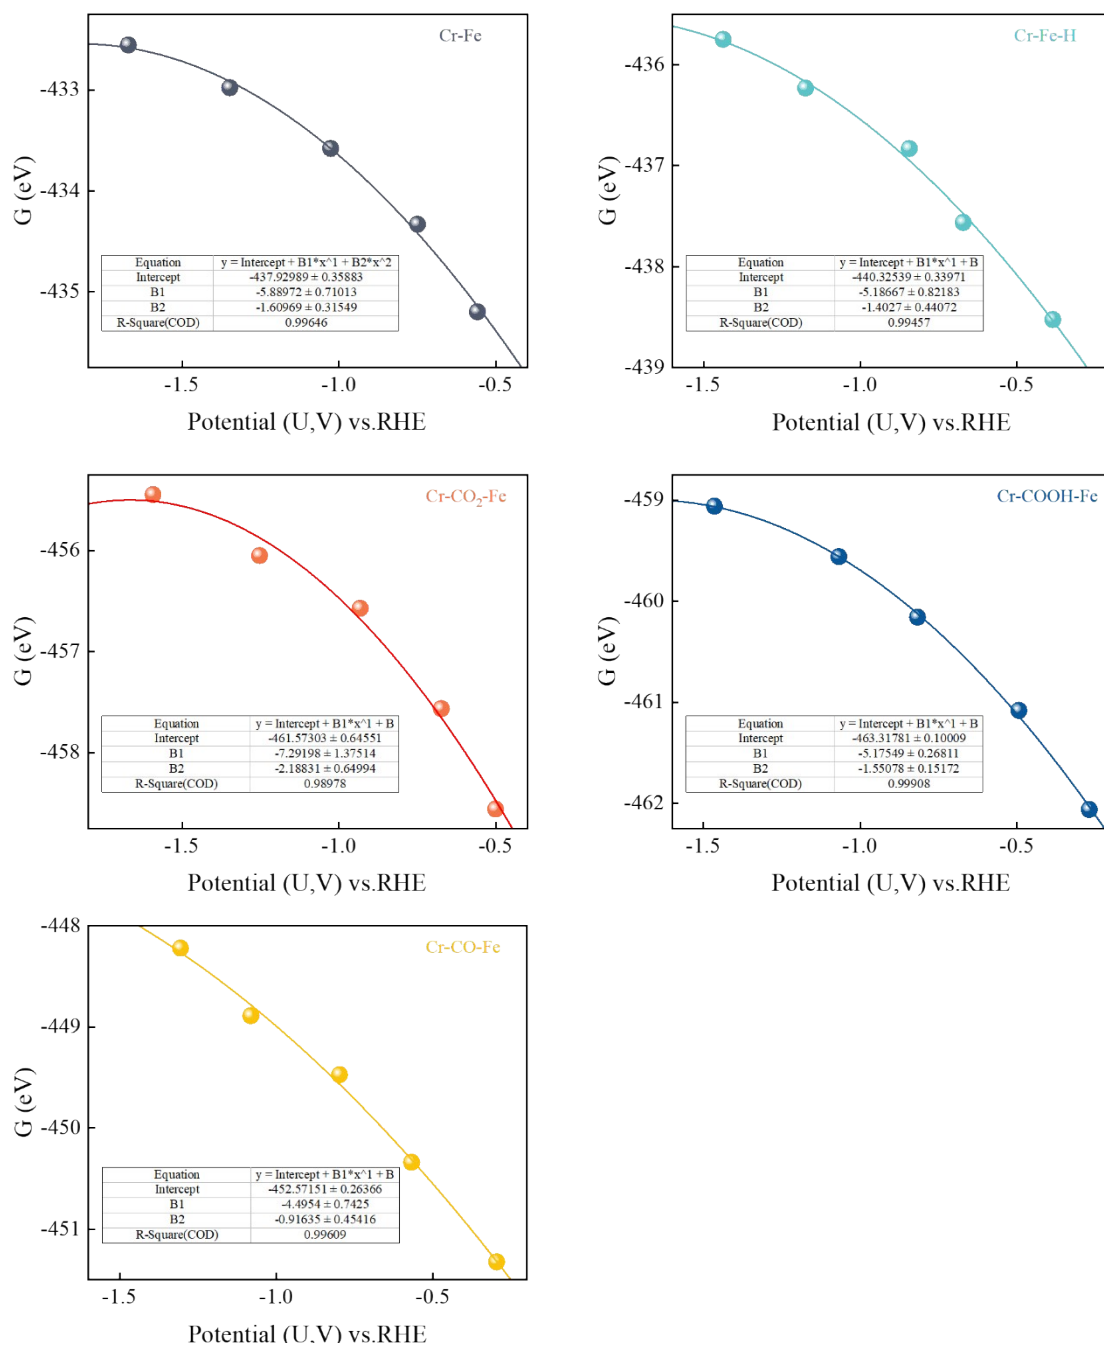

Figure S10. Free energy profiles and polynomial fits for CrFe@DAC2 in CO<sub>2</sub>RR-to-CO and HER processes, analyzed as a function of potential  $U_{\text{RHE}}$  calculated using the constant potential method (CPM).

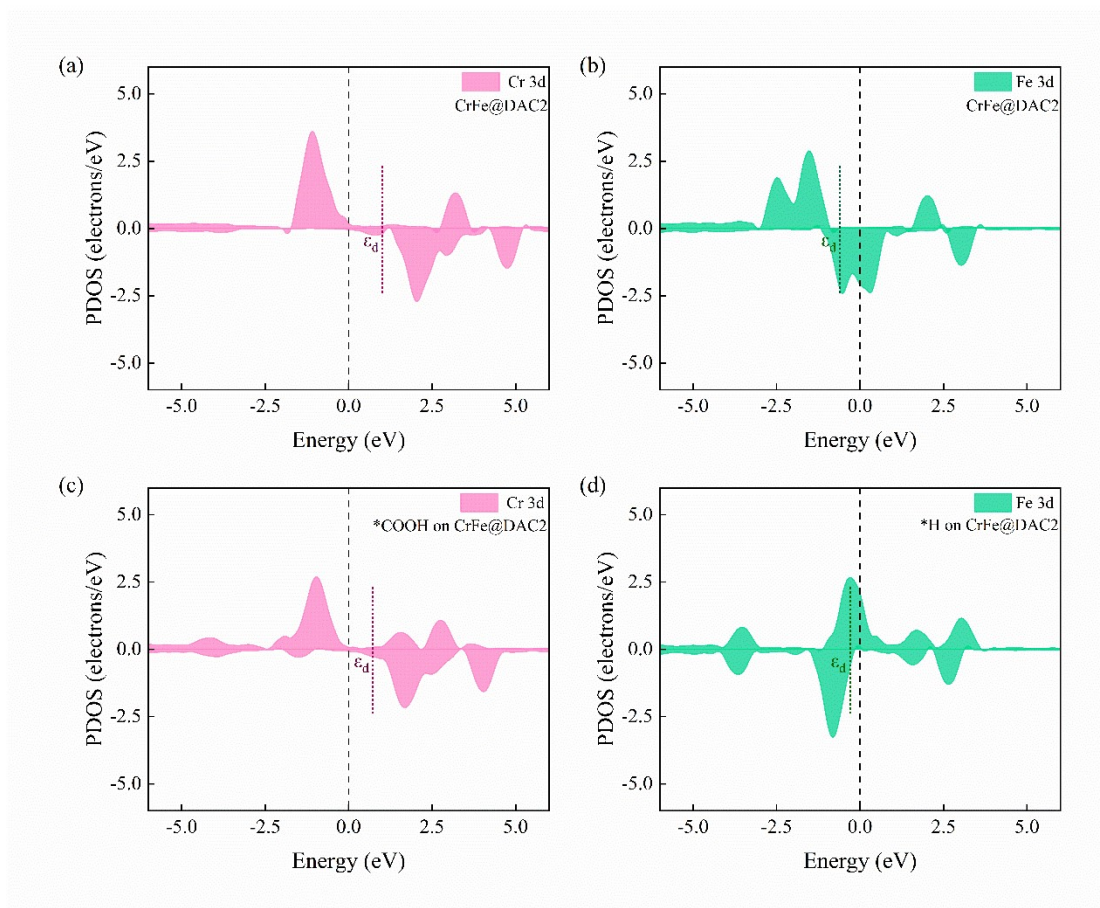

Figure S11. The PDOS and d-band-center ( $\epsilon_d$ ) of Cr and Fe atoms on the pristine CrFe@DAC2 and after adsorption of reaction intermediates.
